# Supplementary material for: Independent Regulation of Basal Neurotransmitter Release Efficacy by Variable Ca2+ Influx and Bouton Size at Small Central Synapses
Source: PubMed Central journal article supplement (PMC3457933; doi:10.1371/journal.pbio.1001396), 2012-09-25
Supplement: pbio.1001396.s008.pdf [file pbio.1001396.s008.pdf]

**Table S1. Parameters used in the numerical non-stationary single compartment model.**

| Model parameter                                        | Symbol                    | Value, range tested        |
|--------------------------------------------------------|---------------------------|----------------------------|
| AP duration[1]                                         | $\sigma$                  | 0.5 ms                     |
| Resting calcium concentration                          | $[Ca^{2+}]_{rest}$        | 50 nM*                     |
| AP-evoked change of total $Ca^{2+}$ concentration      | $\Delta[Ca^{2+}]_{total}$ | 0 – 300 $\mu$ M            |
| $Ca^{2+}$ extrusion rate<br>Figure 1 G                 | $k_{rem}$                 | 1.0 - 2.0 $ms^{-1}$        |
| <b>Fluorescent indicator (Fluo-4) Parameters [2,3]</b> |                           |                            |
| $Ca^{2+}$ association rate                             | $k_{on}^I$                | 0.6 $\mu M^{-1} ms^{-1}$   |
| $Ca^{2+}$ dissociation rate                            | $k_{off}^I$               | 0.21 $ms^{-1}$             |
| Total indicator concentration,<br>Figure S2 A and B    | $[I]_{total}$             | 150 - 190 $\mu$ M          |
| Dynamic range                                          | $\gamma$                  | 100                        |
| <b>Parvalbumin[4]</b>                                  |                           |                            |
| $Ca^{2+}$ association rate                             | $k_{on}^B$                | 0.018 $\mu M^{-1} ms^{-1}$ |
| $Ca^{2+}$ dissociation rate                            | $k_{off}^B$               | 0.00095 $ms^{-1}$          |
| Dissociation constant                                  | $K_D^B$                   | 0.051 $\mu$ M              |
| Total concentration of $Ca^{2+}$ binding sites         | $[B]_{total}$             | 0 - 300 $\mu$ M            |
| <b>Calbindin-D<sub>28k</sub>[5,6]</b>                  |                           |                            |
| $Ca^{2+}$ association rate fast binding sites          | $k_{on}^{B_1}$            | 0.087 $\mu M^{-1} ms^{-1}$ |
| $Ca^{2+}$ dissociation rate fast binding sites         | $k_{off}^{B_1}$           | 0.037 $ms^{-1}$            |
| Dissociation constant fast binding sites               | $K_D^{B_1}$               | 0.42 $\mu$ M               |
| Total concentration of fast $Ca^{2+}$ binding sites    | $[B_1]_{total}$           | 0 - 150 $\mu$ M            |
| $Ca^{2+}$ association rate slow binding sites          | $k_{on}^{B_2}$            | 0.011 $\mu M^{-1} ms^{-1}$ |
| $Ca^{2+}$ dissociation rate slow binding sites         | $k_{off}^{B_2}$           | 0.0026 $ms^{-1}$           |
| Dissociation constant slow binding sites               | $K_D^{B_2}$               | 0.24 $\mu$ M               |
| Total concentration of slow $Ca^{2+}$ binding sites    | $[B_2]_{total}$           | 0 - 150 $\mu$ M            |

\*The average resting  $Ca^{2+}$  concentration was estimated using the formula

$$[Ca^{2+}]_{rest} = K_D^I \frac{F_0 / F_m - 1 / \gamma}{1 - F_0 / F_m} \quad [3].$$

#### Reference List

1. Bischofberger J, Geiger JR, Jonas P (2002) Timing and efficacy of  $Ca^{2+}$  channel activation in hippocampal mossy fiber boutons. J Neurosci 22: 10593-10602.

2. Gee KR, Brown KA, Chen WN, Bishop-Stewart J, Gray D, Johnson I (2000) Chemical and physiological characterization of fluo-4 Ca(2+)-indicator dyes. *Cell Calcium* 27: 97-106.
3. Maravall M, Mainen ZF, Sabatini BL, Svoboda K (2000) Estimating intracellular calcium concentrations and buffering without wavelength ratioing. *Biophys J* 78: 2655-2667.
4. Lee SH, Schwaller B, Neher E (2000) Kinetics of Ca<sup>2+</sup> binding to parvalbumin in bovine chromaffin cells: implications for [Ca<sup>2+</sup>] transients of neuronal dendrites. *J Physiol* 525 Pt 2: 419-432.
5. Nagerl UV, Novo D, Mody I, Vergara JL (2000) Binding kinetics of calbindin-D(28k) determined by flash photolysis of caged Ca(2+). *Biophys J* 79: 3009-3018.
6. Muller A, Kukley M, Stausberg P, Beck H, Muller W, Dietrich D (2005) Endogenous Ca<sup>2+</sup> buffer concentration and Ca<sup>2+</sup> microdomains in hippocampal neurons. *J Neurosci* 25: 558-565.
