# Supplementary material for: Independent Regulation of Basal Neurotransmitter Release Efficacy by Variable Ca2+ Influx and Bouton Size at Small Central Synapses
Source: PLoS Biol. 2012 Sep 25;10(9):e1001396. doi: 10.1371/journal.pbio.1001396 (PMC3457933; doi:10.1371/journal.pbio.1001396)
Supplement: Text S1 — Quantification of FM dye (SRC1) de-staining during low-frequency stimulation. (PDF) [file pbio.1001396.s009.pdf]

## Text S1. Quantification of FM dye (SRC1) de-staining during low frequency stimulation.

In this section we consider a quantitative model which allows estimating basic presynaptic parameters using SRC1 de-staining profiles recorded in individual synaptic boutons.

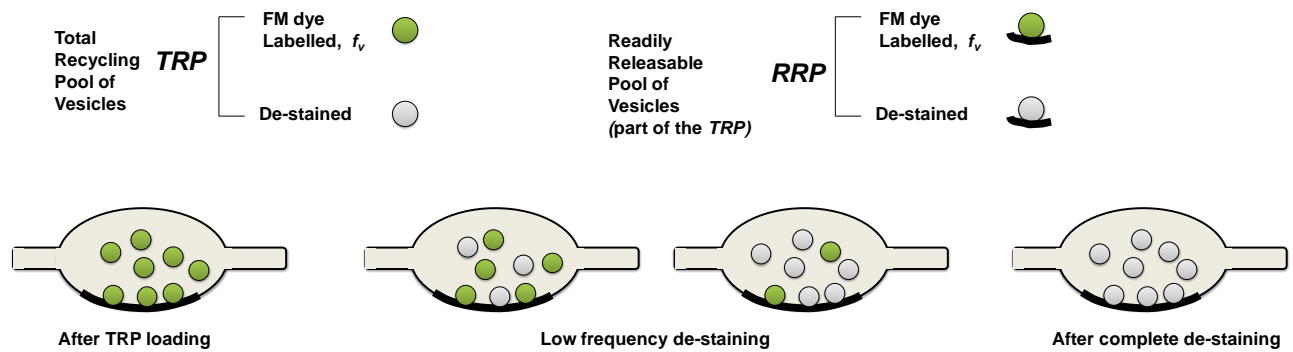

Notation:

$f_v$  specific fluorescence of a single SRC1 labeled vesicle

$RRP$  number of readily-releasable vesicles

$TRP$  total number of recycling vesicles

$p_v$  average release probability of individual vesicles within RRP

$F_{FM}(t)$  specific vesicular FM dye fluorescence intensity in individual synaptic boutons

Model assumptions:

In general, FM dye de-staining profiles have complex shapes that depend on the type of FM dye used and on loading/stimulation protocols [1–5]. It has however been shown that vesicles within RRP and TRP co-exist in a dynamic equilibrium [6,7]. Therefore we hypothesized that, during low frequency (0.5 Hz) stimulation, there is enough time for

newly endocytosed fluorescence-free vesicles to re-equilibrate between the TRP and RRP between successive APs. To test this hypothesis we compared SRC1 de-staining at 0.5 Hz and 0.25 Hz. If SRC1 de-staining was significantly affected by depletion of RRP vesicles or by preferential recycling of RPP vesicles (for example as has been reported after bursts of high frequency stimulation [7]), then the SRC1 de-staining per AP should be higher at 0.25 Hz than at 0.5 Hz. However, no such difference between SRC1 de-staining rates at these two frequencies was found when  $k_{AP}$  was normalized by the number of APs (Figure S1 G - I). We therefore conclude that, during low frequency stimulation, fluorescence-labeled and fluorescence-free vesicles were equally distributed between RRP and TRP.

We then obtain:

$$\frac{d F_{FM}(t)}{dt} = -\nu \cdot N_{AP} \cdot f_v \cdot \frac{F_{FM}(t)}{\Delta F_{FMtotal}} \quad (1.1)$$

where  $\Delta F_{FMtotal} = TRP \cdot f_v$  is the specific fluorescence of FM dye labeled vesicles corresponding to completely labeled TRP, and  $N_{AP}$  is the average number of vesicles released during a single AP. Under the binomial model [8–10], the average number of vesicles released during a single AP (i.e. vesicular release rate) follows the relationship:

$N_{AP} = RRP \cdot p_v$ . This yields:

$$\frac{d F_{FM}(t)}{dt} = -\nu \cdot [RRP / TRP] \cdot p_v \cdot F_{FM}(t) \quad \text{and}$$

$$F_{FM}(t) = \Delta F_{FMtotal} \cdot \exp(-\nu \cdot [RRP / TRP] \cdot p_v \cdot t)$$

Thus the experimentally determined AP-specific SRC1 de-staining rate can be expressed as:

$$k_{AP} = \nu \cdot [RRP / TRP] p_v \quad (1.2)$$

Consequently, another experimentally determined parameter – the vesicular release rate

( $R_{rel} = \frac{\Delta F_{FMtotal} k_{AP}}{V}$ ) – is proportional to the average number of vesicles released during a

single AP -  $R_{rel} \propto N_{AP}$  :

$$R_{rel} = \frac{\Delta F_{FMtotal} k_{AP}}{V} = TRP \cdot f_v \cdot [RRP / TRP] \cdot p_v = f_v \cdot RRP \cdot p_v = f_v \cdot N_{AP}$$

## Reference List

1. Klingauf J, Kavalali ET, Tsien RW (1998) Kinetics and regulation of fast endocytosis at hippocampal synapses. *Nature* 394: 581-585.
2. Vanden BP, Klingauf J (2006) Synaptic vesicles in rat hippocampal boutons recycle to different pools in a use-dependent fashion. *J Physiol* 572: 707-720.
3. Mozhayeva MG, Sara Y, Liu X, Kavalali ET (2002) Development of vesicle pools during maturation of hippocampal synapses. *J Neurosci* 22: 654-665.
4. Murthy VN, Sejnowski TJ, Stevens CF (1997) Heterogeneous release properties of visualized individual hippocampal synapses. *Neuron* 18: 599-612.
5. Waters J, Smith SJ (2002) Vesicle pool partitioning influences presynaptic diversity and weighting in rat hippocampal synapses. *J Physiol* 541: 811-823.
6. Murthy VN, Stevens CF (1999) Reversal of synaptic vesicle docking at central synapses. *Nat Neurosci* 2: 503-507.
7. Pyle JL, Kavalali ET, Piedras-Renteria ES, Tsien RW (2000) Rapid reuse of readily releasable pool vesicles at hippocampal synapses. *Neuron* 28: 221-231.
8. Schneggenburger R, Sakaba T, Neher E (2002) Vesicle pools and short-term synaptic depression: lessons from a large synapse. *Trends Neurosci* 25: 206-212.
9. Christie JM, Jahr CE (2006) Multivesicular release at Schaffer collateral-CA1 hippocampal synapses. *J Neurosci* 26: 210-216.
10. Oertner TG, Sabatini BL, Nimchinsky EA, Svoboda K (2002) Facilitation at single synapses probed with optical quantal analysis. *Nat Neurosci* 5: 657-664.
