# Supplementary material for: Independent Regulation of Basal Neurotransmitter Release Efficacy by Variable Ca2+ Influx and Bouton Size at Small Central Synapses
Source: PLoS Biol. 2012 Sep 25;10(9):e1001396. doi: 10.1371/journal.pbio.1001396 (PMC3457933; doi:10.1371/journal.pbio.1001396)
Supplement: Text S3 — Modeling presynaptic Ca2+ dynamics using non-stationary single compartment model. (PDF) [file pbio.1001396.s011.pdf]

### Text S3. Modeling presynaptic $\text{Ca}^{2+}$ dynamics using non-stationary single compartment model

The non-stationary model of presynaptic  $\text{Ca}^{2+}$  dynamics has been previously described by [1,2]. Briefly, the model assumes that presynaptic  $\text{Ca}^{2+}$  dynamics depend on the  $\text{Ca}^{2+}$  entry rate  $j_{\text{Ca}}$ , binding-unbinding reactions with the endogenous buffers  $B_i$  and  $\text{Ca}^{2+}$  indicator  $I$ , and  $\text{Ca}^{2+}$  removal. The latter is a complex process involving diffusion, pumping out and/or sequestration; generally, it could be approximated by a first-order reaction [3,4] with rate  $P = k_{\text{rem}} \left( [\text{Ca}^{2+}] - [\text{Ca}^{2+}]_{\text{rest}} \right)$ . These considerations are reflected in the system of equations below, where the brackets denote concentrations, and the superscript indices of the reaction rate constants denote endogenous  $\text{Ca}^{2+}$  buffers  $B_i$  or the indicator  $I$ .

$$\begin{aligned} \frac{d[\text{Ca}^{2+}]}{dt} &= j_{\text{Ca}} + k_{\text{off}}^I [\text{Ca}I] - k_{\text{on}}^I [\text{Ca}^{2+}][I] + \sum_i \left( k_{\text{off}}^{B_i} [\text{Ca}B_i] - k_{\text{on}}^{B_i} [\text{Ca}^{2+}][B_i] \right) - k_{\text{rem}} \left( [\text{Ca}^{2+}] - [\text{Ca}^{2+}]_{\text{rest}} \right) \\ \frac{d[I]}{dt} &= k_{\text{off}}^I [\text{Ca}I] - k_{\text{on}}^I [\text{Ca}^{2+}][I] \\ \frac{d[B_i]}{dt} &= k_{\text{off}}^{B_i} [\text{Ca}B_i] - k_{\text{on}}^{B_i} [\text{Ca}^{2+}][B_i] \end{aligned}$$

The AP-dependent  $\text{Ca}^{2+}$  influx time course  $j_{\text{Ca}}$  was approximated by the Gaussian

$$\text{function } j_{\text{Ca}} = \frac{\Delta[\text{Ca}^{2+}]_{\text{total}}}{\sigma\sqrt{2\pi}} \exp\left(-\frac{(t-t_{\text{AP}})^2}{2\sigma^2}\right) \text{ where } t_{\text{AP}} \text{ denotes the time of the AP and}$$

$\Delta[\text{Ca}^{2+}]_{\text{total}}$  denotes the total time integral of the volume averaged presynaptic  $\text{Ca}^{2+}$  entry. The mass conservation rules for this system are:  $[I]_{\text{total}} = [I] + [\text{Ca}I]$ ,

$$[B_i]_{\text{total}} = [B_i] + [\text{Ca}B_i].$$

For each set of simulations we numerically solved the above model using the adaptive step-size Runge-Kutta algorithm and calculated the Fluo-4 fluorescence profile normalized to maximal fluorescence of the saturated indicator:

$$\frac{F(t)}{F_m} = \frac{[Ca^{2+}](t) \cdot \gamma + [I](t)}{[I]_{total} \cdot \gamma} \quad (\text{where } \gamma \sim 100 \text{ is the dynamic range of Fluo-4}).$$

The parameters used in the numerical model are summarized in Table S1.

## Reference List

1. Scott R, Rusakov DA (2006) Main determinants of presynaptic Ca<sup>2+</sup> dynamics at individual mossy fiber-CA3 pyramidal cell synapses. *J Neurosci* 26: 7071-7081.
2. Sabatini BL, Regehr WG (1998) Optical measurement of presynaptic calcium currents. *Biophys J* 74: 1549-1563.
3. Jackson MB, Redman SJ (2003) Calcium dynamics, buffering, and buffer saturation in the boutons of dentate granule-cell axons in the hilus. *J Neurosci* 23: 1612-1621.
4. Matveev V, Zucker RS, Sherman A (2004) Facilitation through buffer saturation: constraints on endogenous buffering properties. *Biophys J* 86: 2691-2709.
